# Supplementary material for: Identification of a Circulating Amino Acid Signature in Frail Older Persons with Type 2 Diabetes Mellitus: Results from the Metabofrail Study
Source: MDPI journal article supplement (doi:10.3390/nu12010199), 2020-01-12
Supplement: s1 [file s1]

**Table S1.** Serum concentrations of non-discriminant amino acids and derivatives in frail/pre-frail participants with type 2 diabetes mellitus (F-T2DM) and controls.

| Analytes                     | F-T2DM (n = 66)   | Controls (n = 30) |
|------------------------------|-------------------|-------------------|
| $\alpha$ -amino butyric acid | 29.5 $\pm$ 12.9   | 22.3 $\pm$ 5.7    |
| $\beta$ -alanine             | 8.5 $\pm$ 3.3     | 6.5 $\pm$ 2.6     |
| $\beta$ -aminobutyric acid   | 2.9 $\pm$ 1.5     | 1.7 $\pm$ 1.1     |
| 1-methylhistidine            | 10.6 $\pm$ 10.1   | 9.2 $\pm$ 16.7    |
| 3-methylhistidine            | 7.8 $\pm$ 4.2     | 5.2 $\pm$ 2.5     |
| 4-hydroxyproline             | 17.6 $\pm$ 8.8    | 17.2 $\pm$ 7.9    |
| Alanine                      | 542.3 $\pm$ 165.8 | 384.2 $\pm$ 98.3  |
| Amino adipic acid            | 2.7 $\pm$ 1.7     | 1.3 $\pm$ 0.8     |
| Arginine                     | 168.3 $\pm$ 91.2  | 103.7 $\pm$ 31.2  |
| Asparagine                   | 78.8 $\pm$ 20.0   | 77.8 $\pm$ 13.4   |
| Aspartic acid                | 22.0 $\pm$ 8.2    | 17.0 $\pm$ 4.0    |
| Citrulline                   | 36.5 $\pm$ 14.8   | 36.8 $\pm$ 11.5   |
| Cystine                      | 5.2 $\pm$ 4.7     | 32.4 $\pm$ 11.3   |
| Ethanolamine                 | 11.5 $\pm$ 3.4    | 9.0 $\pm$ 2.2     |
| Glycine                      | 253.0 $\pm$ 73.0  | 260.9 $\pm$ 65.6  |
| Glutamic acid                | 130.0 $\pm$ 66.7  | 54.3 $\pm$ 21.3   |
| Histidine                    | 95.3 $\pm$ 24.0   | 82.2 $\pm$ 11.4   |
| Isoleucine                   | 91.9 $\pm$ 31.8   | 63.2 $\pm$ 18.3   |
| Leucine                      | 170.2 $\pm$ 55.4  | 121.9 $\pm$ 27.0  |
| Lysine                       | 251.8 $\pm$ 85.9  | 196.8 $\pm$ 41.6  |
| Methionine                   | 28.2 $\pm$ 9.8    | 23.4 $\pm$ 5.8    |
| Ornithine                    | 103.2 $\pm$ 37.6  | 109.4 $\pm$ 25.0  |
| Phenylalanine                | 85.7 $\pm$ 28.6   | 66.1 $\pm$ 11.0   |
| Proline                      | 268.2 $\pm$ 100.4 | 199.9 $\pm$ 44.4  |
| Sarcosine                    | 2.5 $\pm$ 0.9     | 1.5 $\pm$ 0.5     |
| Serine                       | 140.1 $\pm$ 41.1  | 118.7 $\pm$ 16.9  |
| Taurine                      | 100.4 $\pm$ 49.0  | 189.5 $\pm$ 47.2  |
| Threonine                    | 137.9 $\pm$ 51.5  | 125.1 $\pm$ 22.3  |
| Tryptophan                   | 66.2 $\pm$ 23.4   | 62.0 $\pm$ 13.1   |
| Tyrosine                     | 78.2 $\pm$ 25.3   | 65.7 $\pm$ 14.6   |
| Valine                       | 302.7 $\pm$ 90.3  | 221.2 $\pm$ 42.9  |

Data are shown as mean  $\pm$  standard deviation. Concentrations are expressed in  $\mu\text{mol/L}$ .

Concentrations of  $\gamma$ -aminobutyric acid, anserine, carnosine, cystathionine, phosphoethanolamine, and phosphoserine were below the detection limit.
